# Supplementary material for: Mutation of isoleucine 705 of the oxidosqualene-lanosterol cyclase from Saccharomyces cerevisiae affects lanosterol's C/D-ring cyclization and 17α/β-exocyclic side chain stereochemistry
Source: Royal Society of Chemistry journal article supplement (doi:10.1039/c0ob00582g), 2010-10-20

**Mutation of Isoleucine 705 of the Oxidosqualene-Lanosterol Cyclase from *Saccharomyces cerevisiae* Affects Lanosterol's C/D-Ring Cyclization and 17 $\alpha$ / $\beta$ -Exocyclic Side Chain Stereochemistry**

Tung-Kung Wu\*, Yu-Chun Chang, Cheng-Hsiang Chang, Yuan-Ting Liu, Hao-Yu Wen, Wen-Hsuan Li,  
and Wen-Shiang Shie

Department of Biological Science and Technology

National Chiao Tung University

300, Hsin-Chu, Taiwan, Republic of China

\*Corresponding author: Tel: +886-3-5729287; Fax: +886-3-5725700

e-mail: tkwml@mail.nctu.edu.tw

## Table of Contents

Page

### Spectra

|                                                                                                            |    |
|------------------------------------------------------------------------------------------------------------|----|
| 17 $\alpha$ -protosta-20(22),24-dien-3 $\beta$ -ol, <b>8</b> , MS                                          | 3  |
| 17 $\alpha$ -protosta-20(22),24-dien-3 $\beta$ -ol, <b>8</b> , <sup>1</sup> H-NMR                          | 4  |
| 17 $\alpha$ -protosta-20(22),24-dien-3 $\beta$ -ol, <b>8</b> , <sup>13</sup> C-NMR and DEPT spectrum       | 5  |
| 17 $\alpha$ -protosta-20(22),24-dien-3 $\beta$ -ol, <b>8</b> , Extended Important Section of DEPT spectrum | 6  |
| 17 $\alpha$ -protosta-20(22),24-dien-3 $\beta$ -ol, <b>8</b> , <sup>1</sup> H- <sup>1</sup> H COSY         | 7  |
| 17 $\alpha$ -protosta-20(22),24-dien-3 $\beta$ -ol, <b>8</b> , HSQC                                        | 8  |
| 17 $\alpha$ -protosta-20(22),24-dien-3 $\beta$ -ol, <b>8</b> , HMBC                                        | 9  |
| 17 $\alpha$ -protosta-20(22),24-dien-3 $\beta$ -ol, <b>8</b> , Extended Important Section of HMBC spectrum | 10 |
| protosta-16,24-dien-3 $\beta$ -ol, <b>9</b> , MS                                                           | 11 |
| protosta-16,24-dien-3 $\beta$ -ol, <b>9</b> , <sup>1</sup> H-NMR                                           | 12 |
| protosta-16,24-dien-3 $\beta$ -ol, <b>9</b> , <sup>13</sup> C-NMR and DEPT spectrum                        | 13 |
| protosta-16,24-dien-3 $\beta$ -ol, <b>9</b> , Extended Important Section of DEPT spectrum                  | 14 |
| protosta-16,24-dien-3 $\beta$ -ol, <b>9</b> , <sup>1</sup> H- <sup>1</sup> H COSY                          | 15 |
| protosta-16,24-dien-3 $\beta$ -ol, <b>9</b> , HSQC                                                         | 16 |
| protosta-16,24-dien-3 $\beta$ -ol, <b>9</b> , HMBC                                                         | 17 |
| protosta-16,24-dien-3 $\beta$ -ol, <b>9</b> , Extended Important Section of HMBC spectrum                  | 18 |

# MS spectrum of 17 $\alpha$ -protosta-20(22),24-dien-3 $\beta$ -ol, **8**

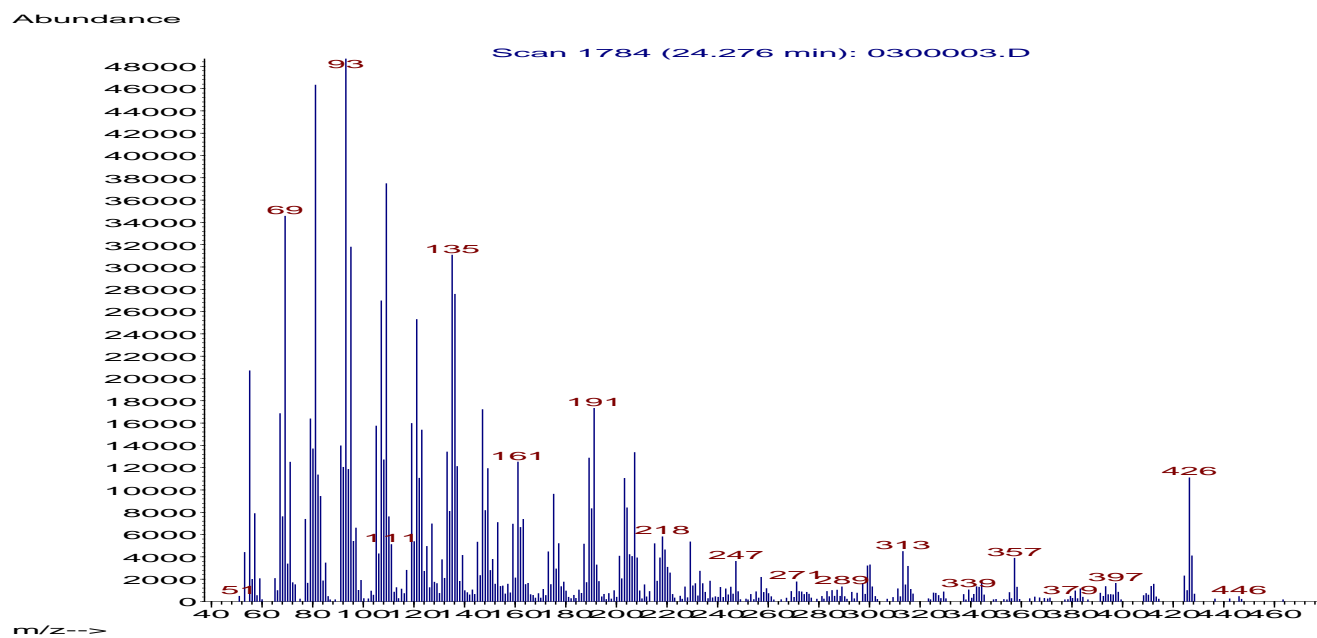

$^1\text{H-NMR}$  spectrum of  $17\alpha$ -protosta-20(22),24-dien-3 $\beta$ -ol, **8**

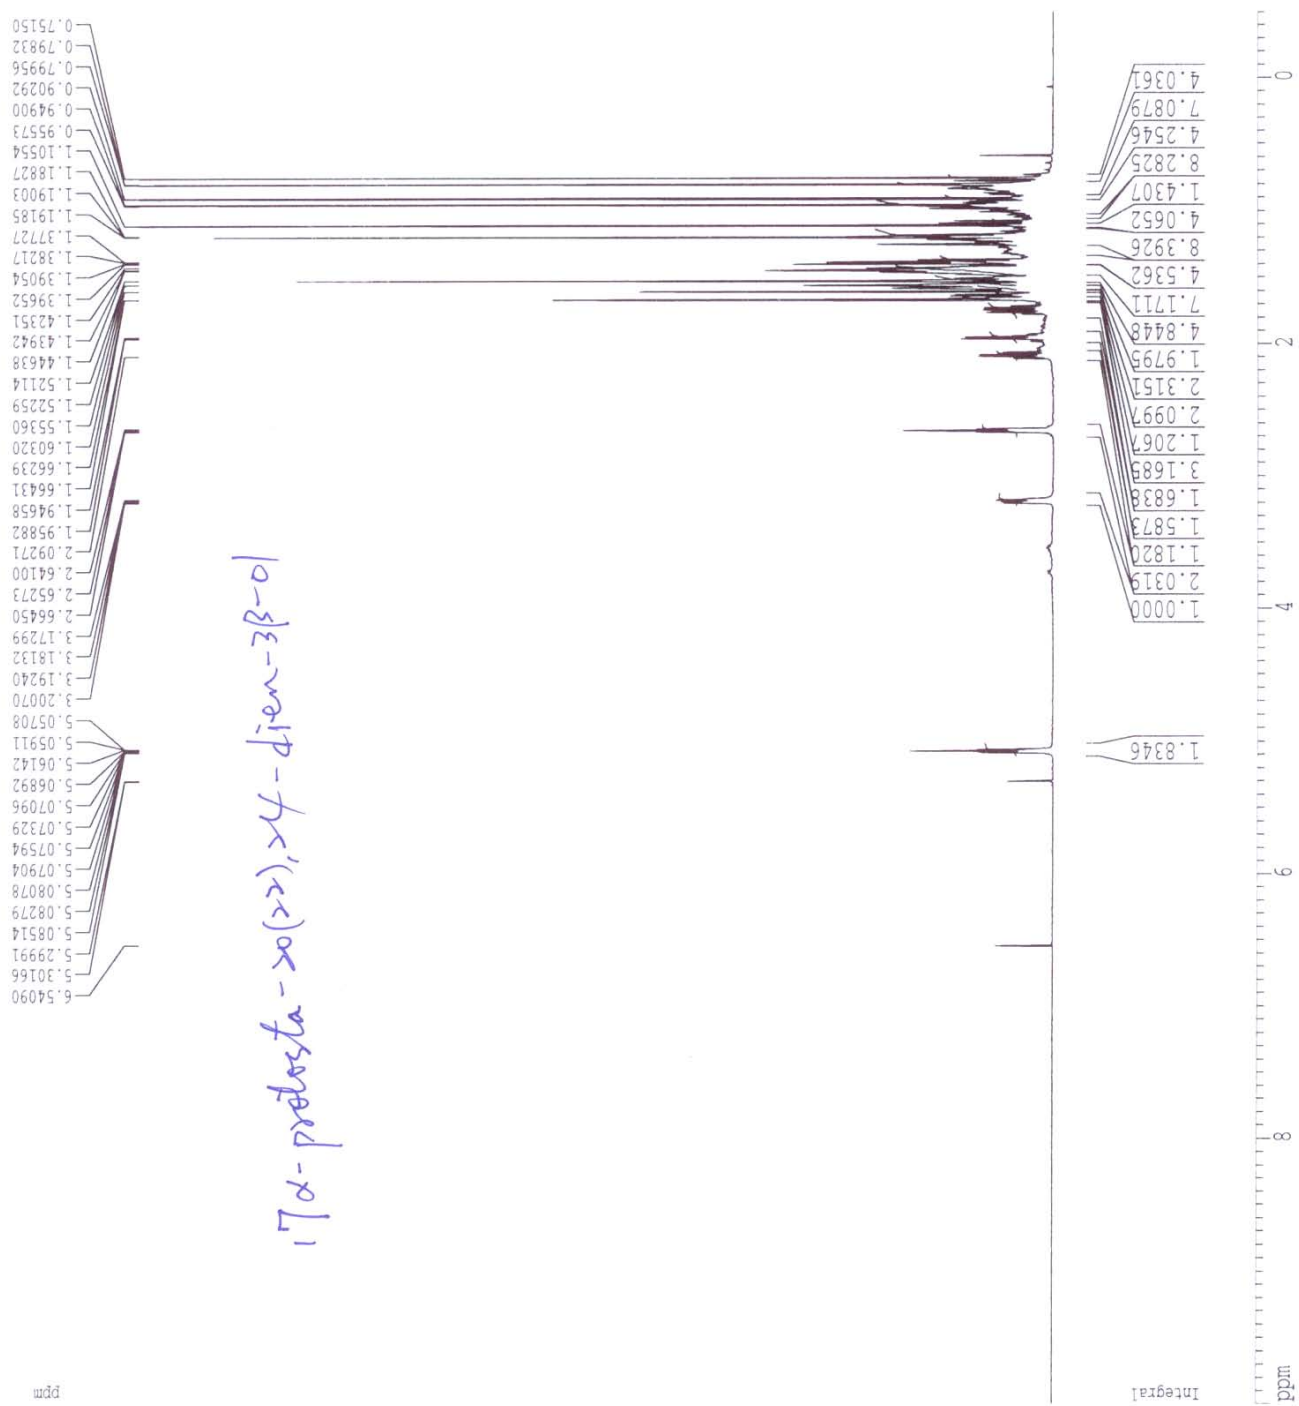

$^{13}\text{C}$ -NMR and DEPT spectra of  $17\alpha$ -protosta-20(22),24-dien-3 $\beta$ -ol, **8**

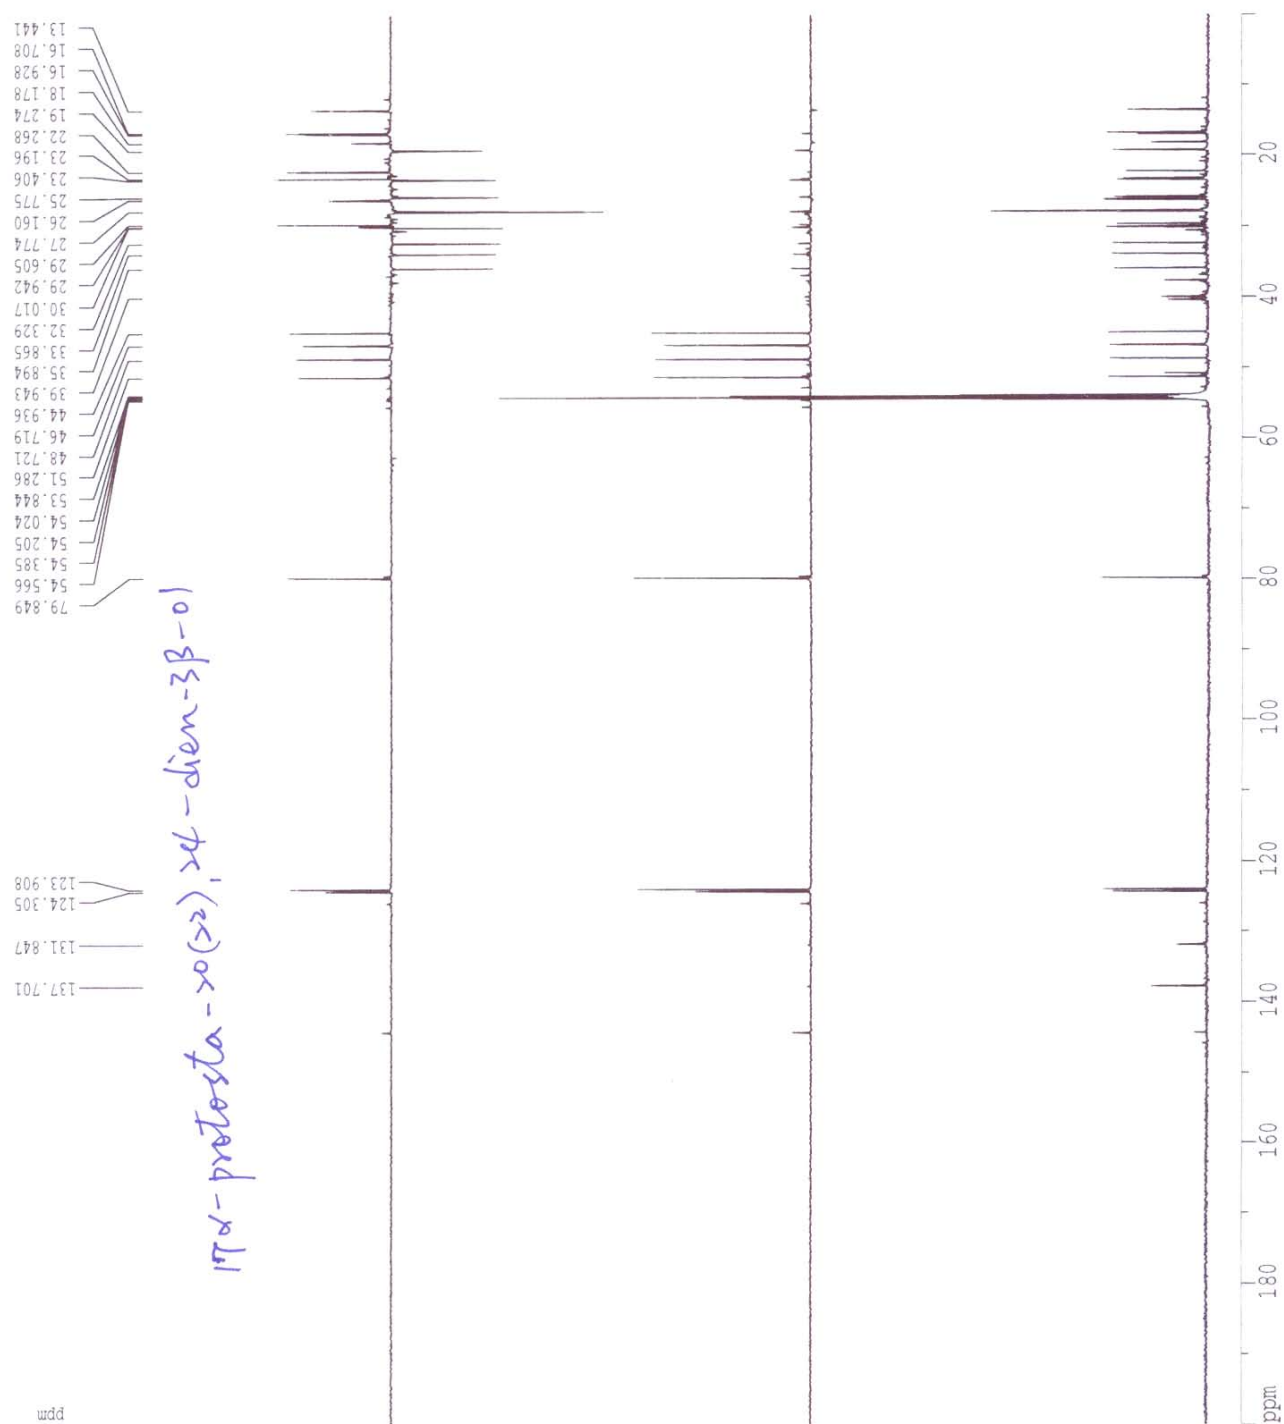

Extended Important Section of DEPT spectra of 17 $\alpha$ -protosta-20(22),24-dien-3 $\beta$ -ol, **8**

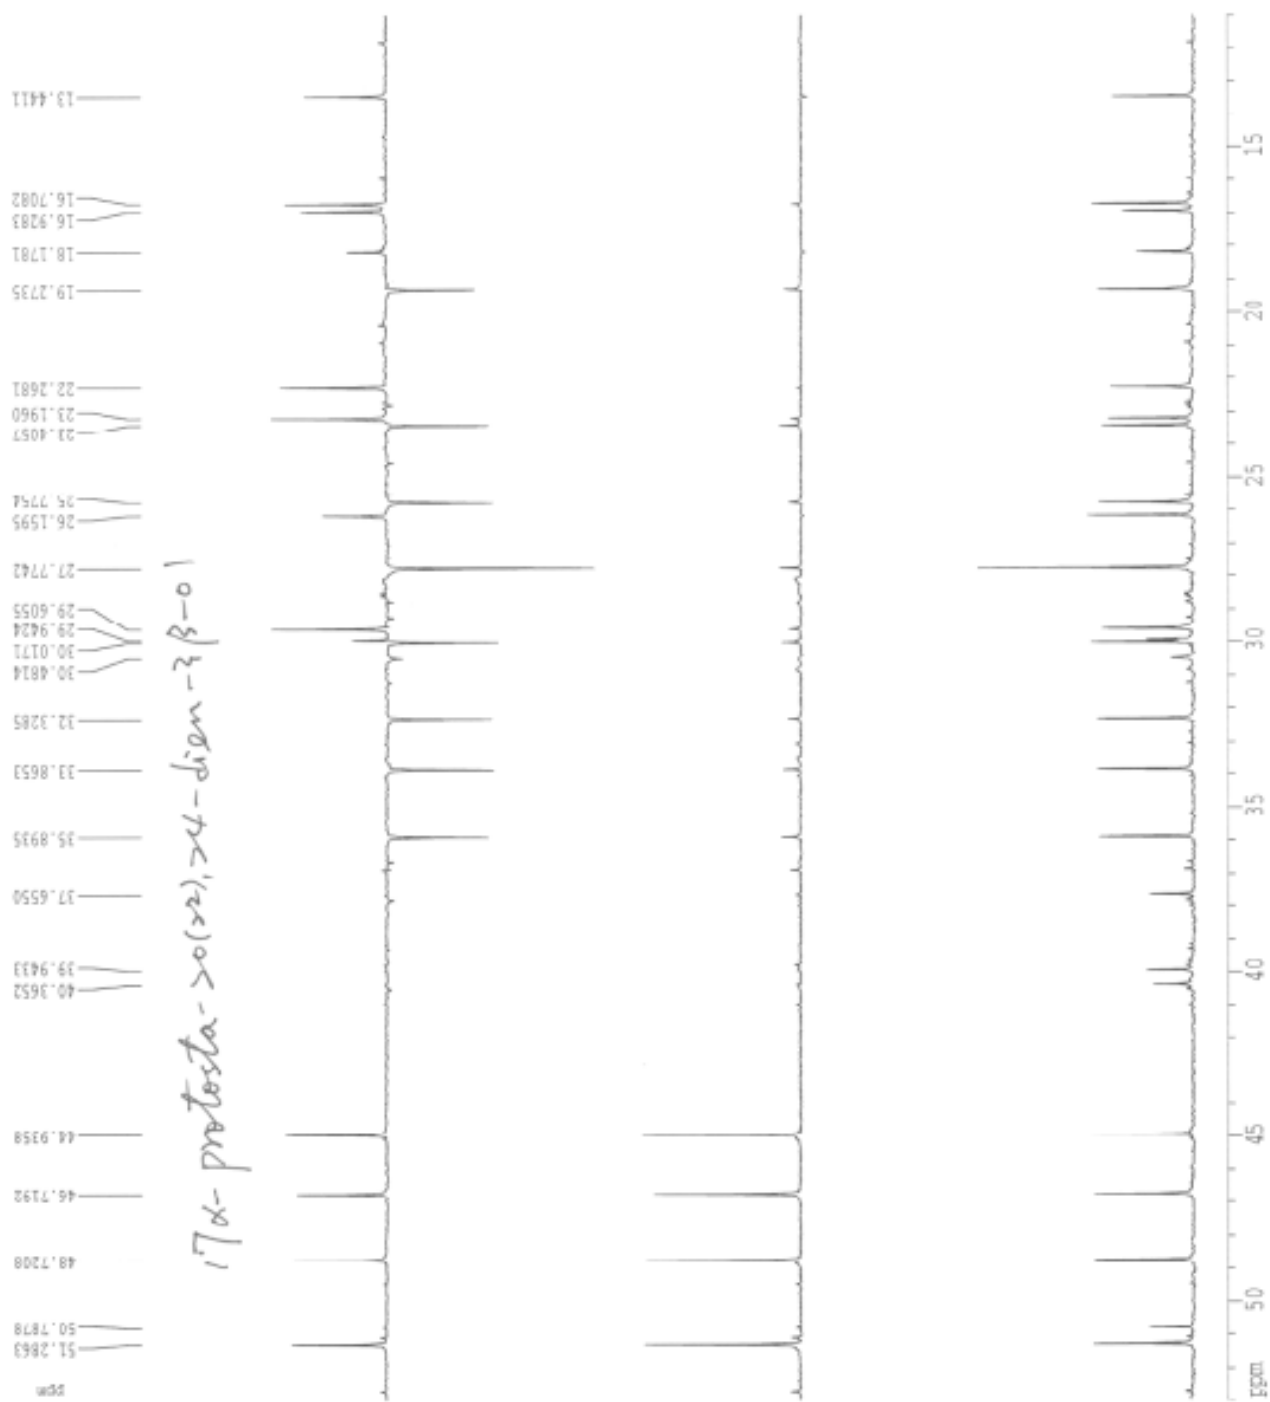

$^1\text{H}$ - $^1\text{H}$  COSY of  $17\alpha$ -protosta-20(22),24-dien-3 $\beta$ -ol, **8**

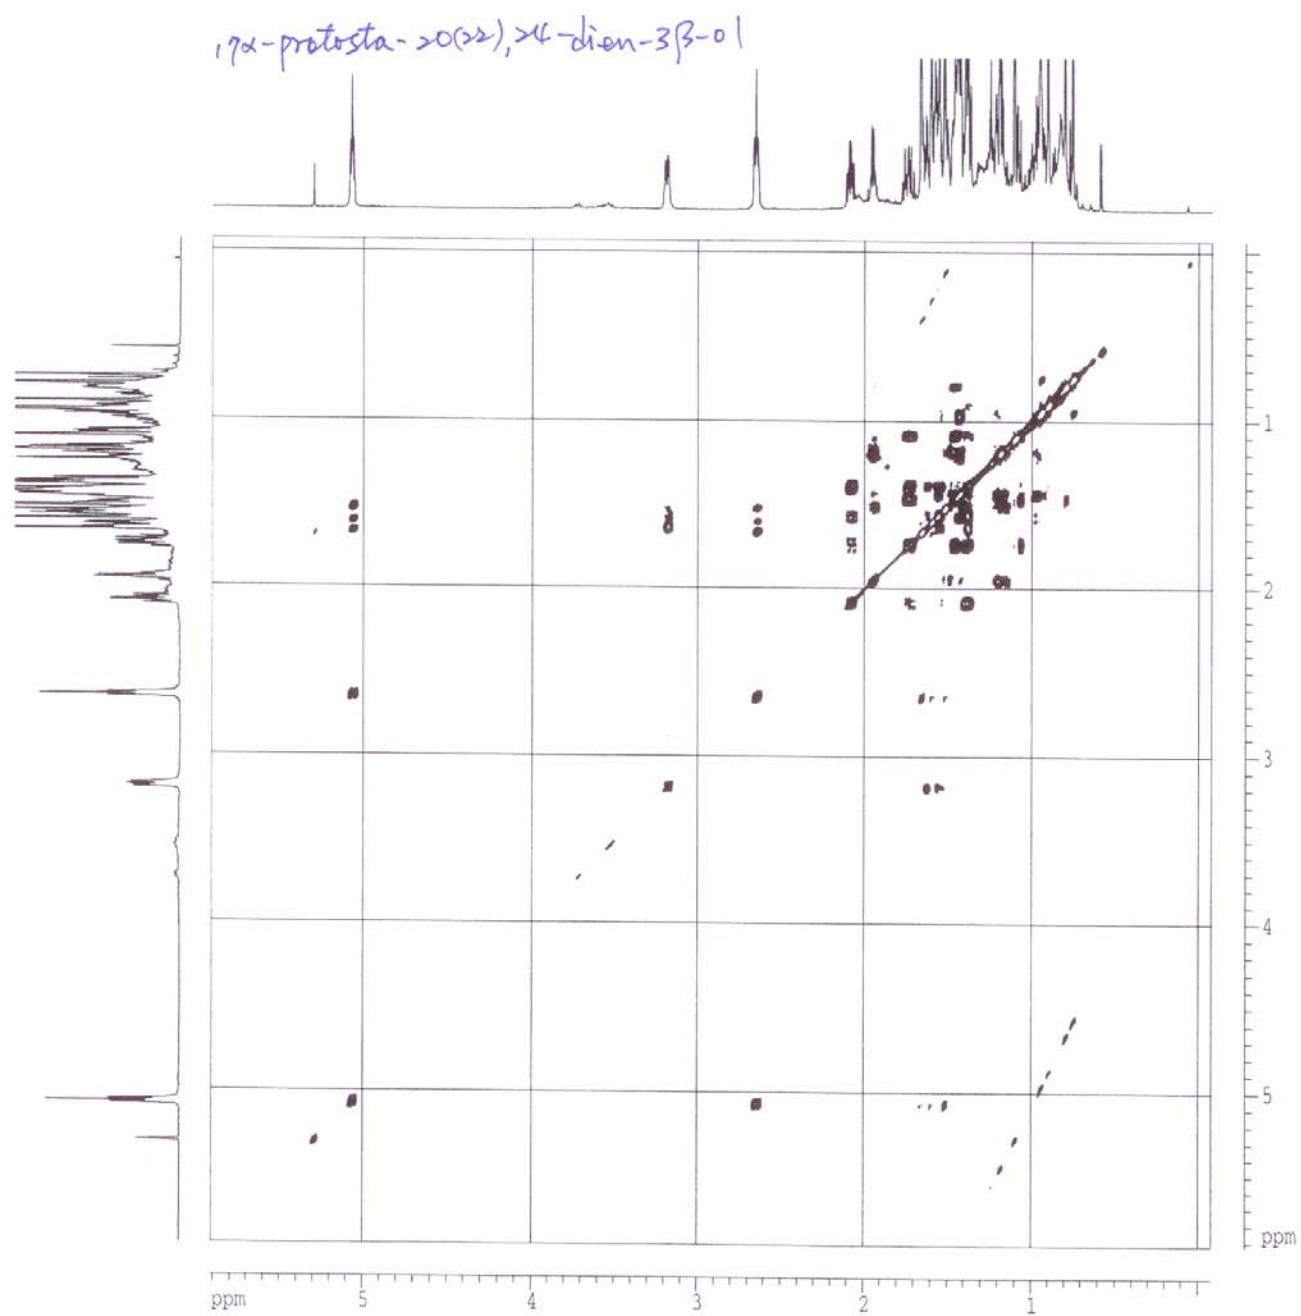

HSQC spectrum of 17 $\alpha$ -protosta-20(22),24-dien-3 $\beta$ -ol, **8**

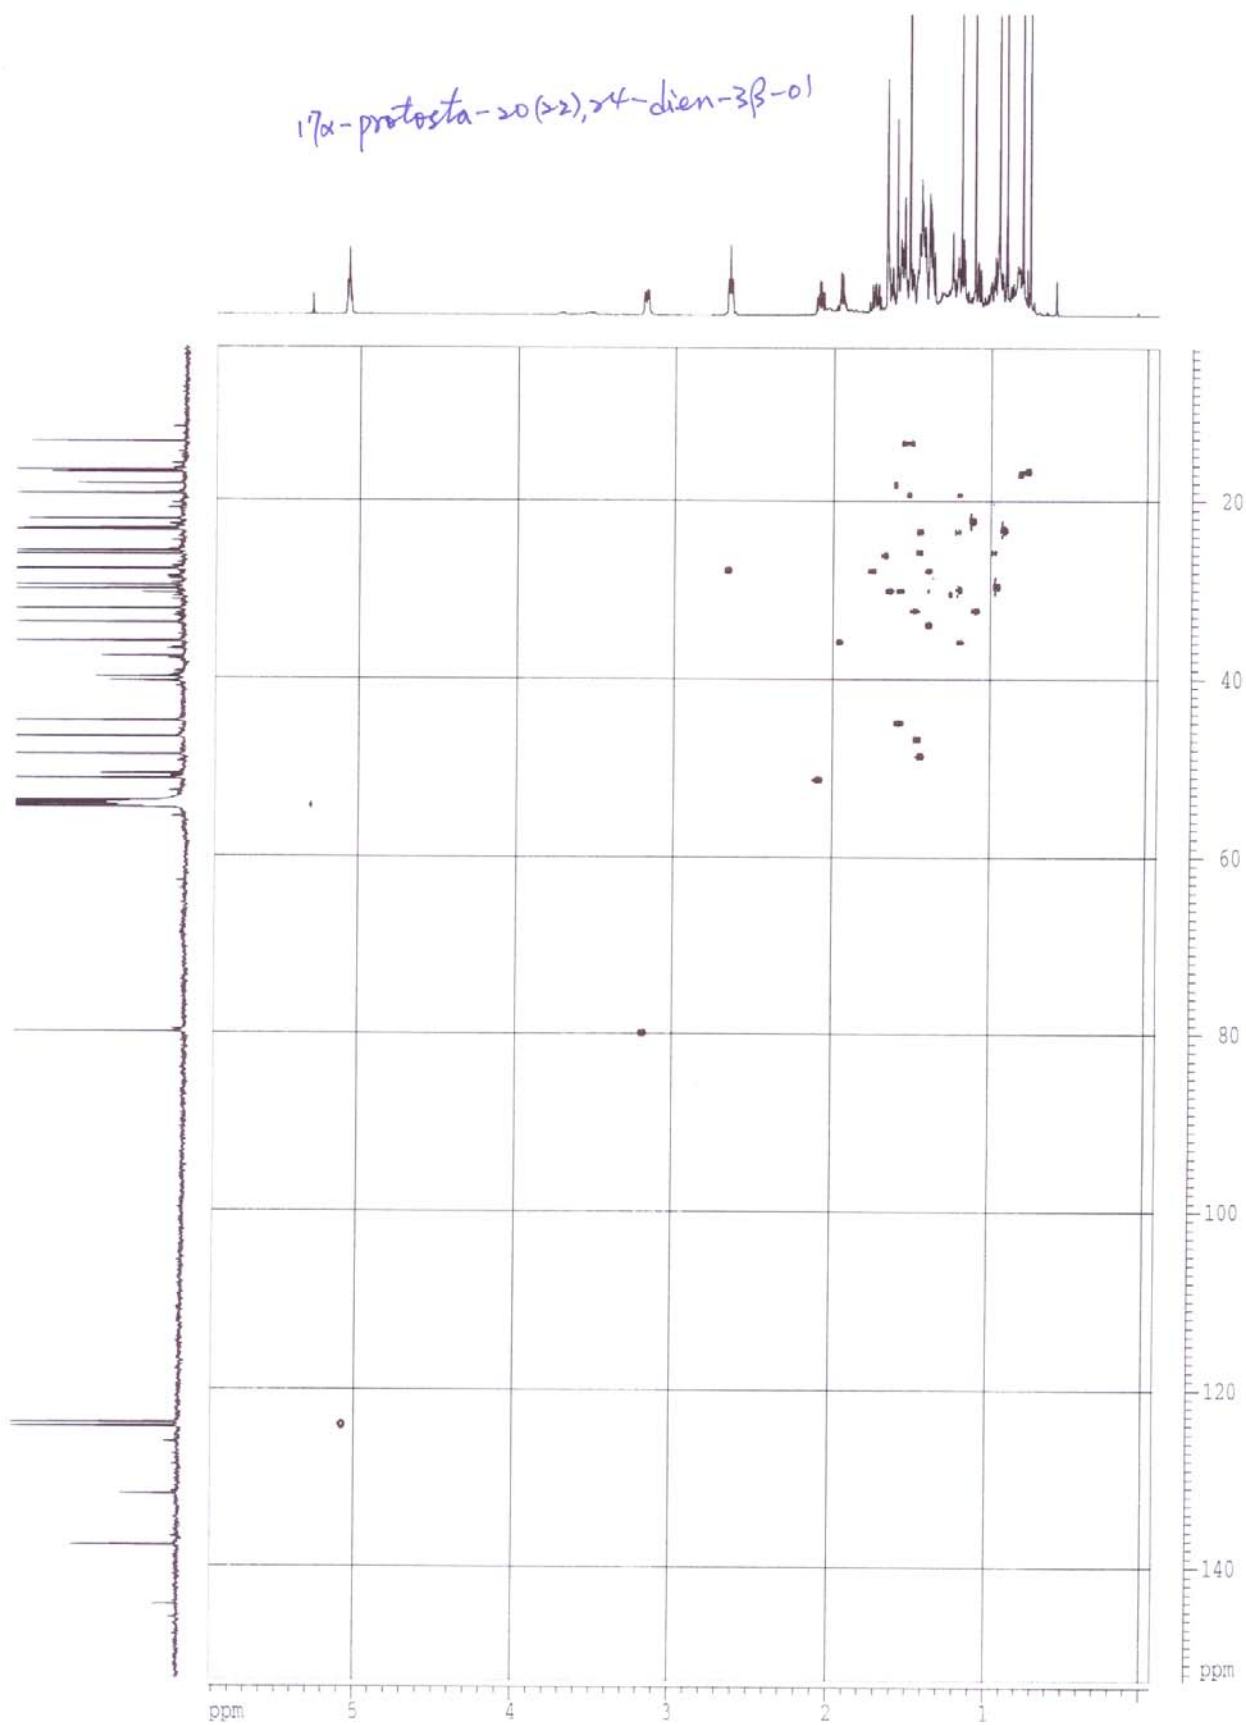



HMBC spectrum of  $17\alpha$ -protosta-20(22),24-dien-3 $\beta$ -ol, **8**

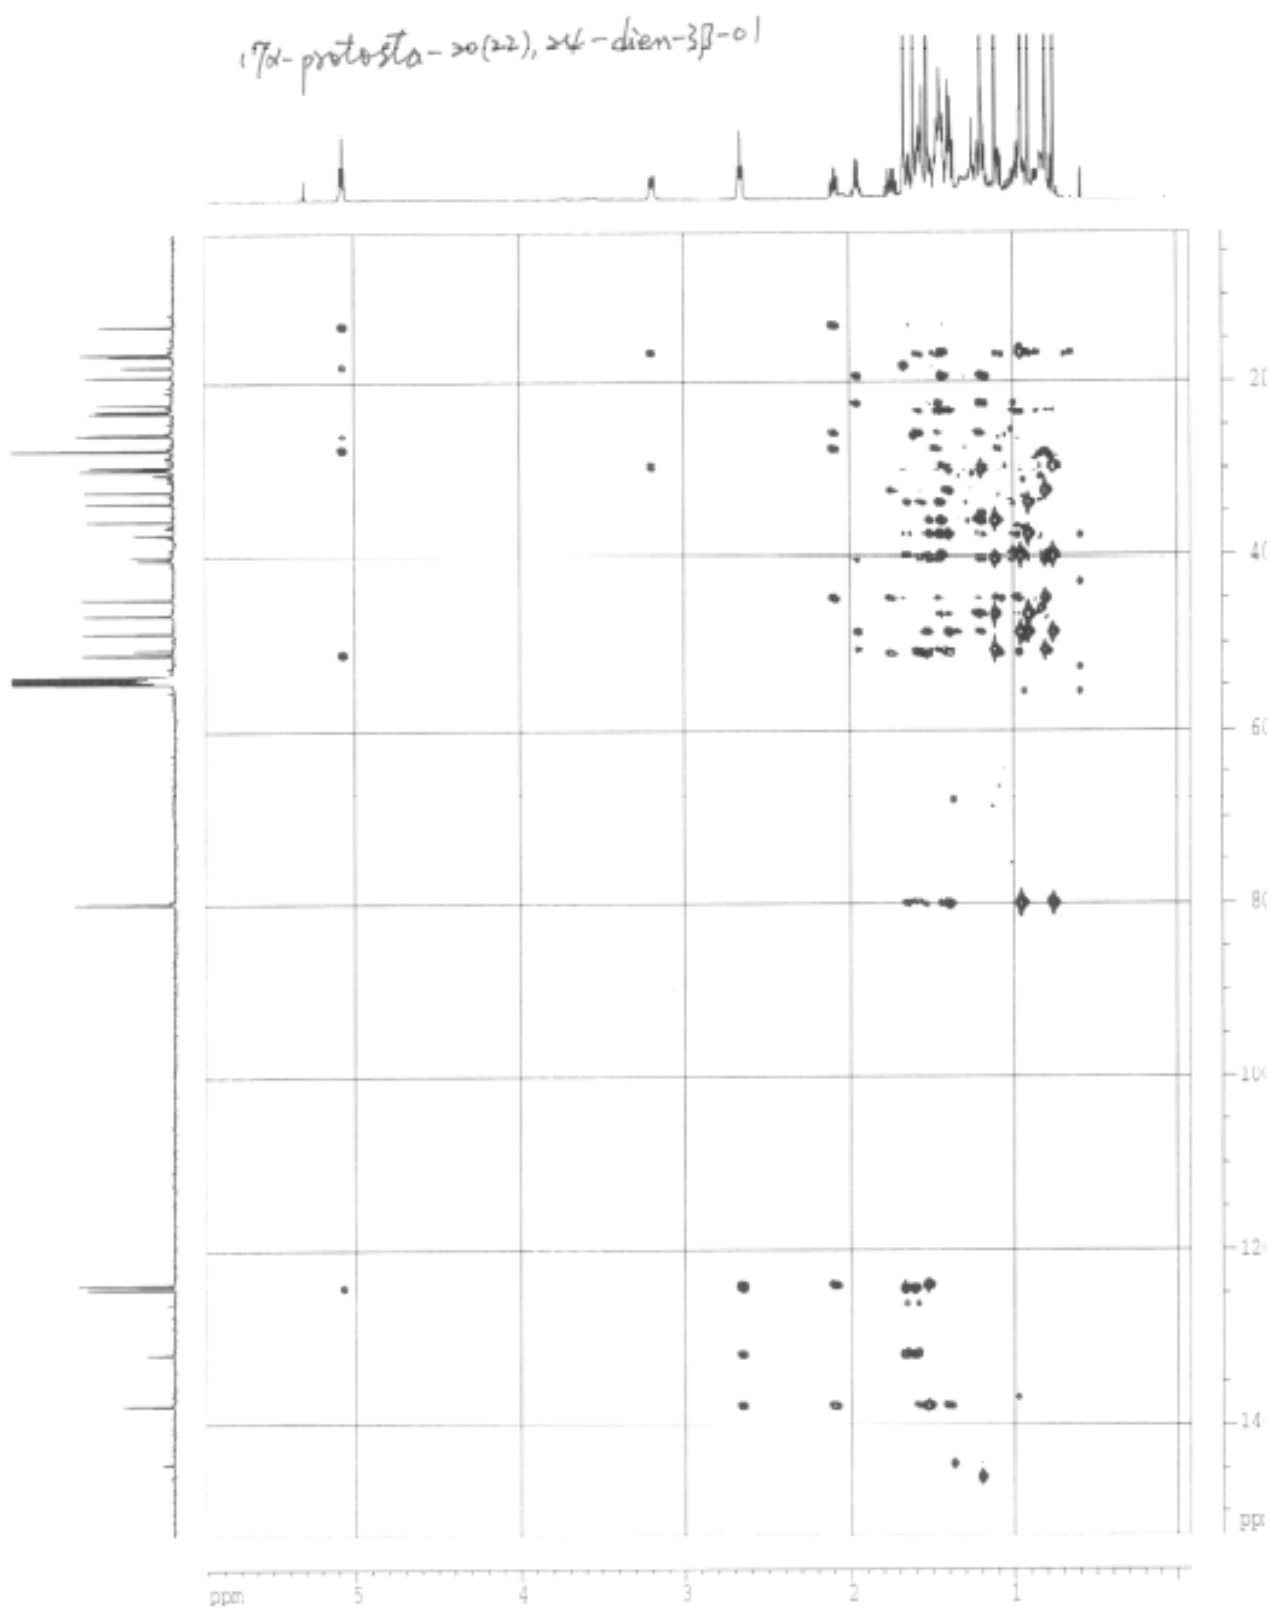

Extended Important Section of HMBC spectrum of  $17\alpha$ -protosta-20(22),24-dien-3 $\beta$ -ol, **8**

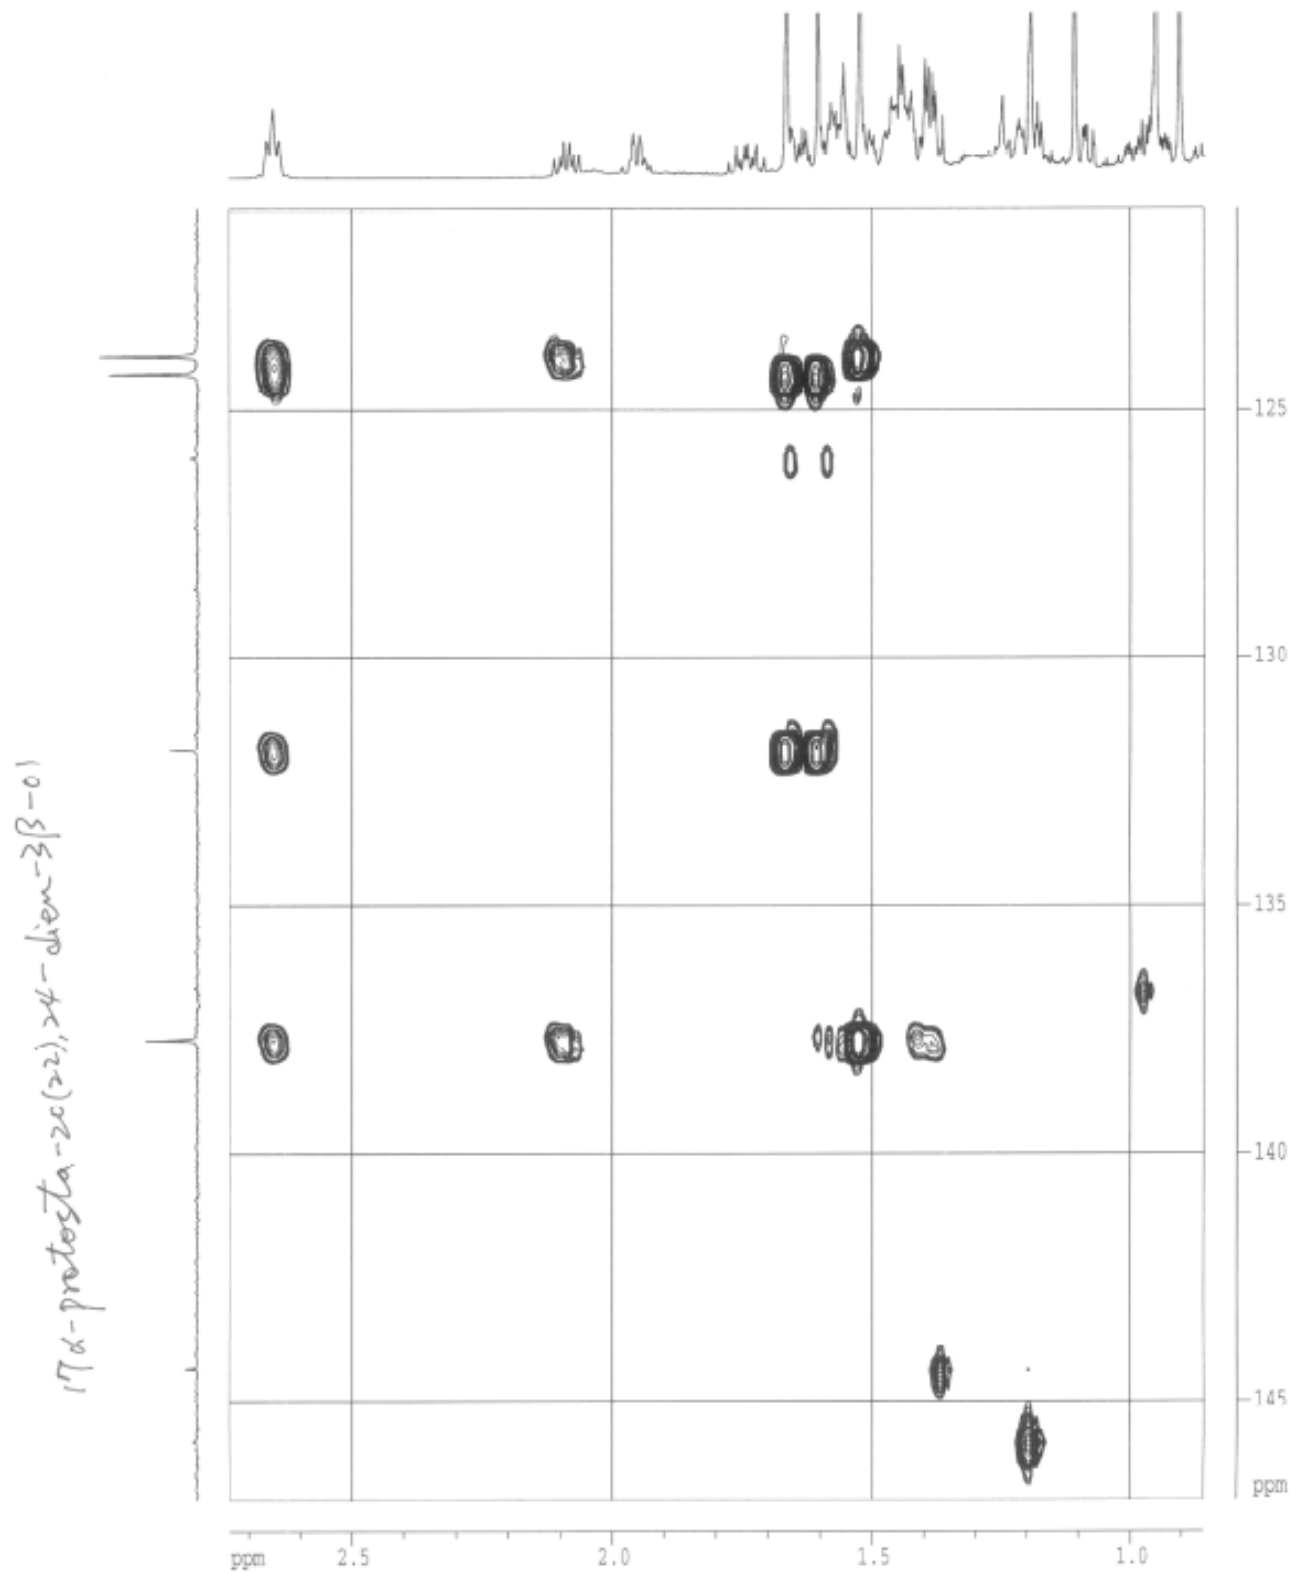

# MS spectrum of protosta-16,24-dien-3 $\beta$ -ol, **9**

Abundance

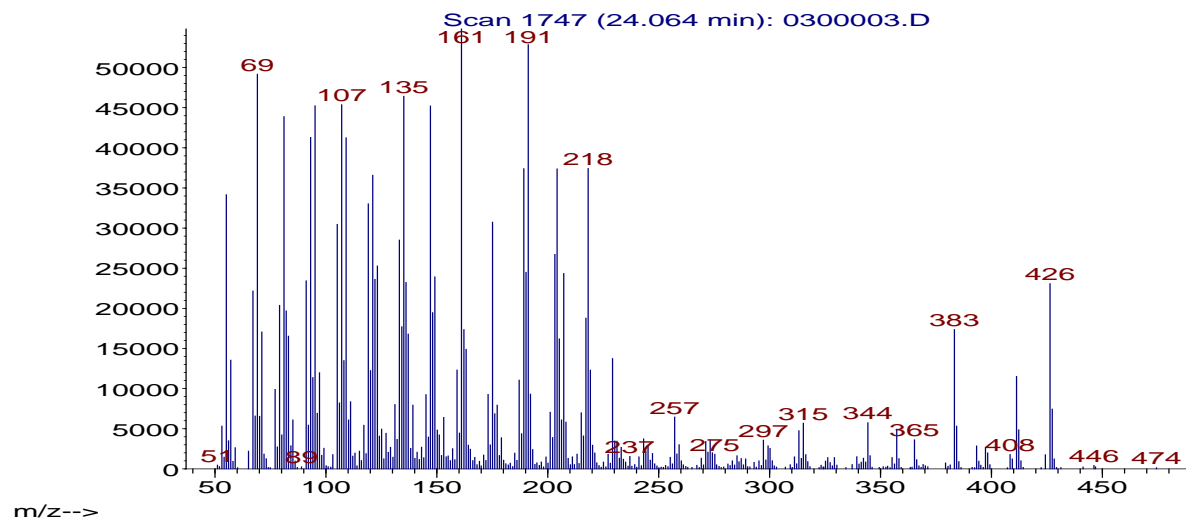

$^1\text{H-NMR}$  spectrum of protosta-16,24-dien-3 $\beta$ -ol, **9**

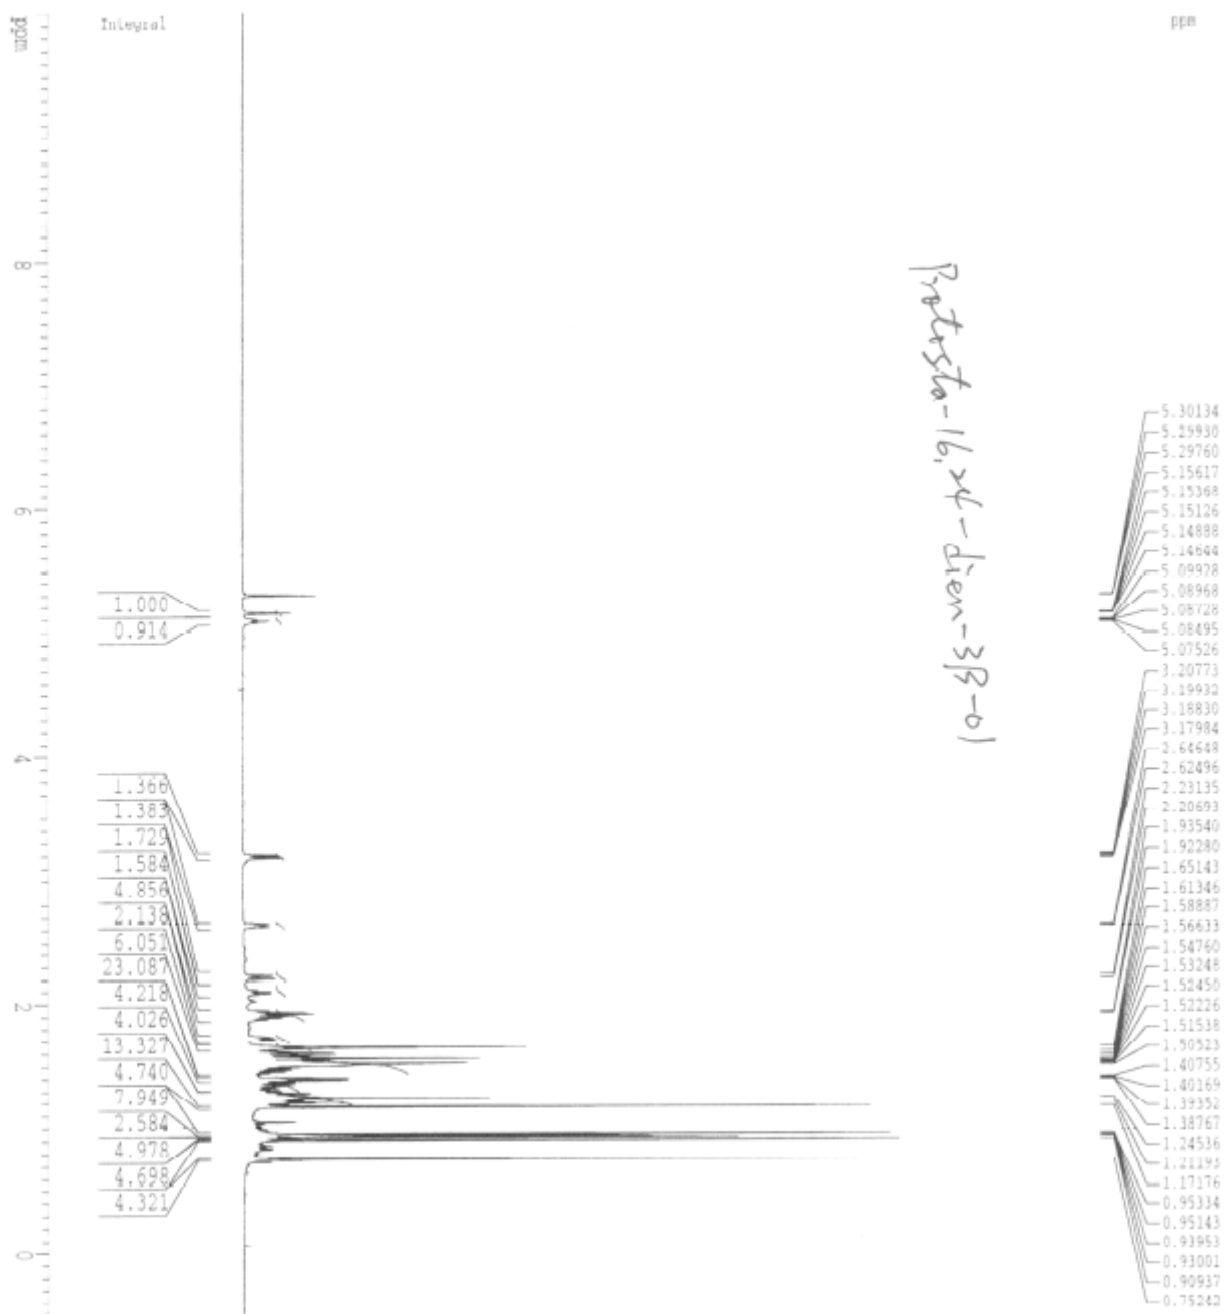

$^{13}\text{C}$ -NMR and DEPT spectra of protosta-16,24-dien-3 $\beta$ -ol, **9**

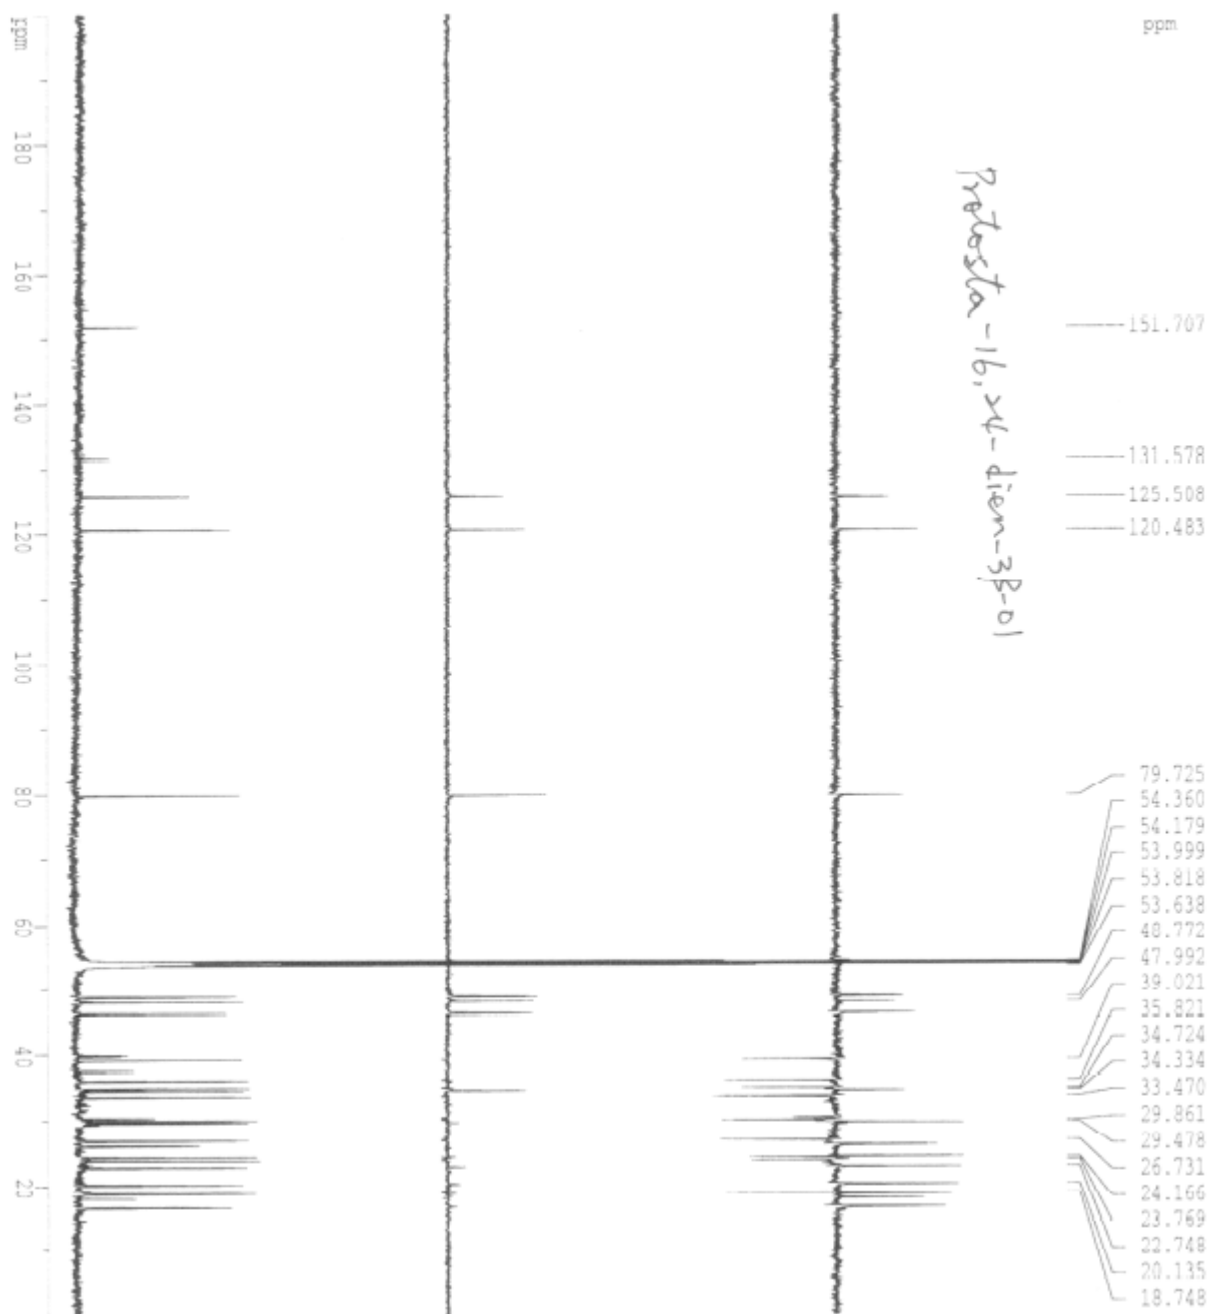

Extended Important Section of DEPT spectra of protosta-16,24-dien-3 $\beta$ -ol, **9**

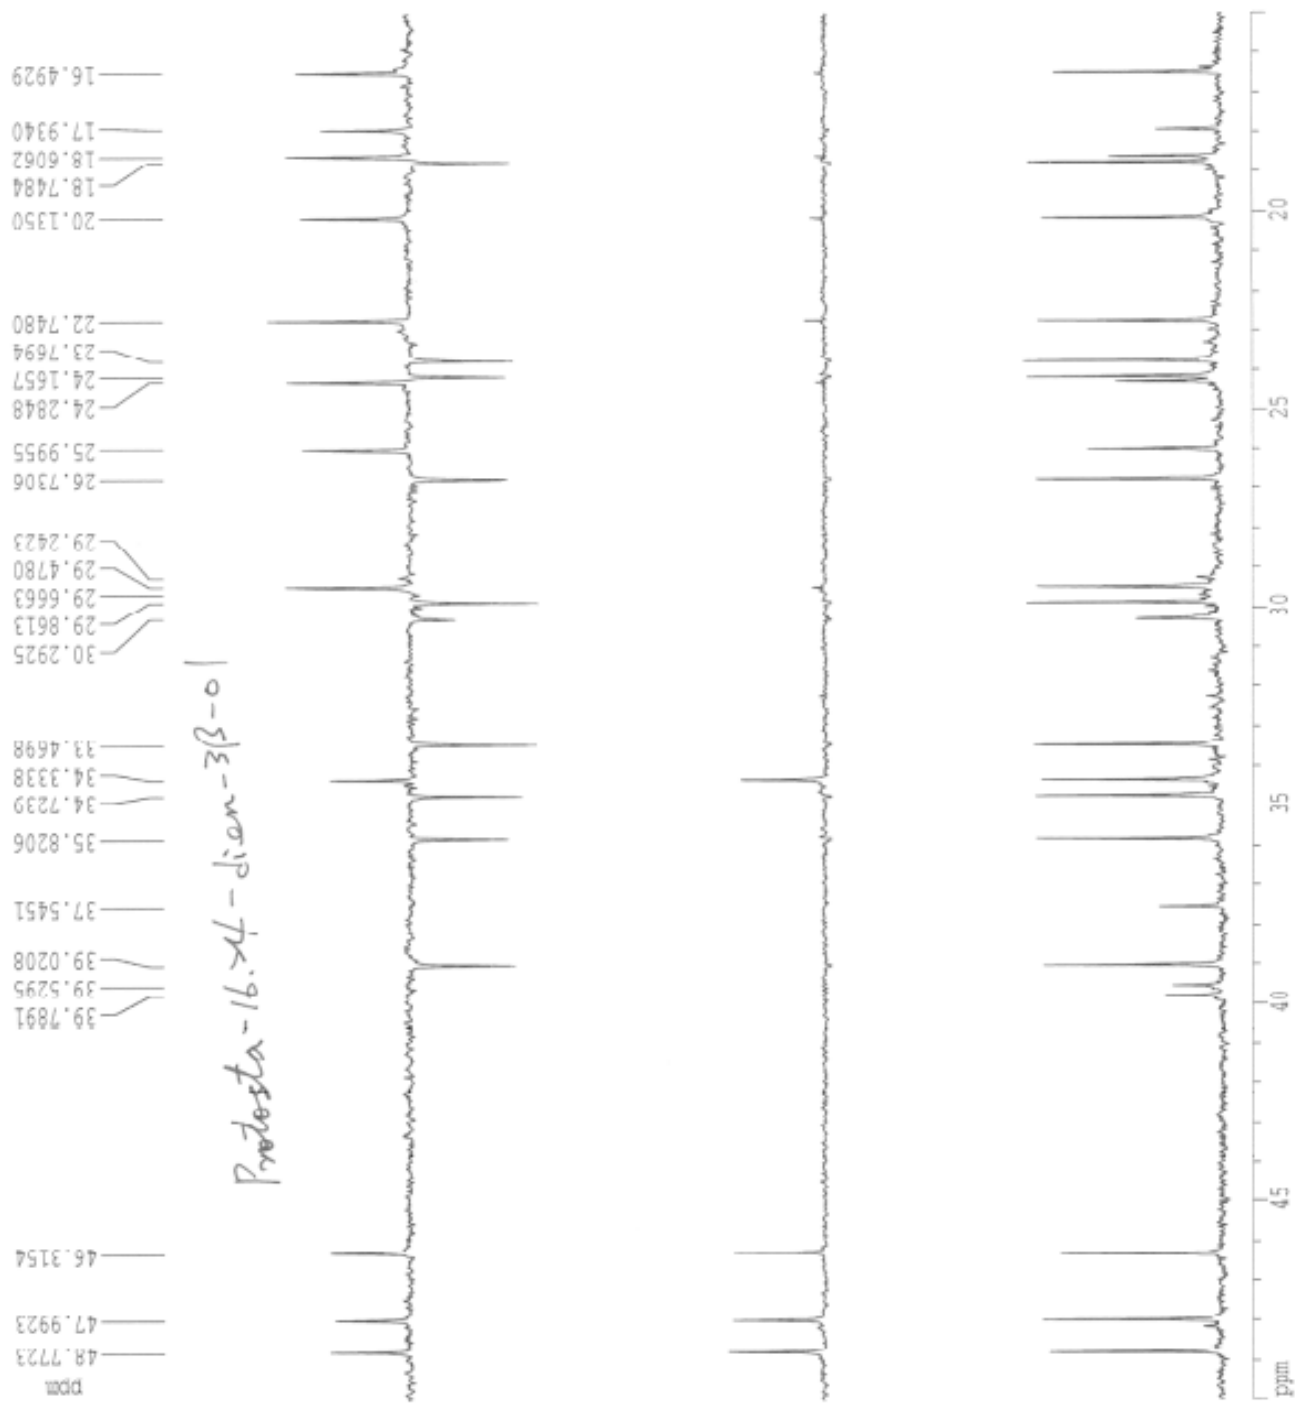

$^1\text{H}$ - $^1\text{H}$  COSY of protosta-16,24-dien-3 $\beta$ -ol, **9**

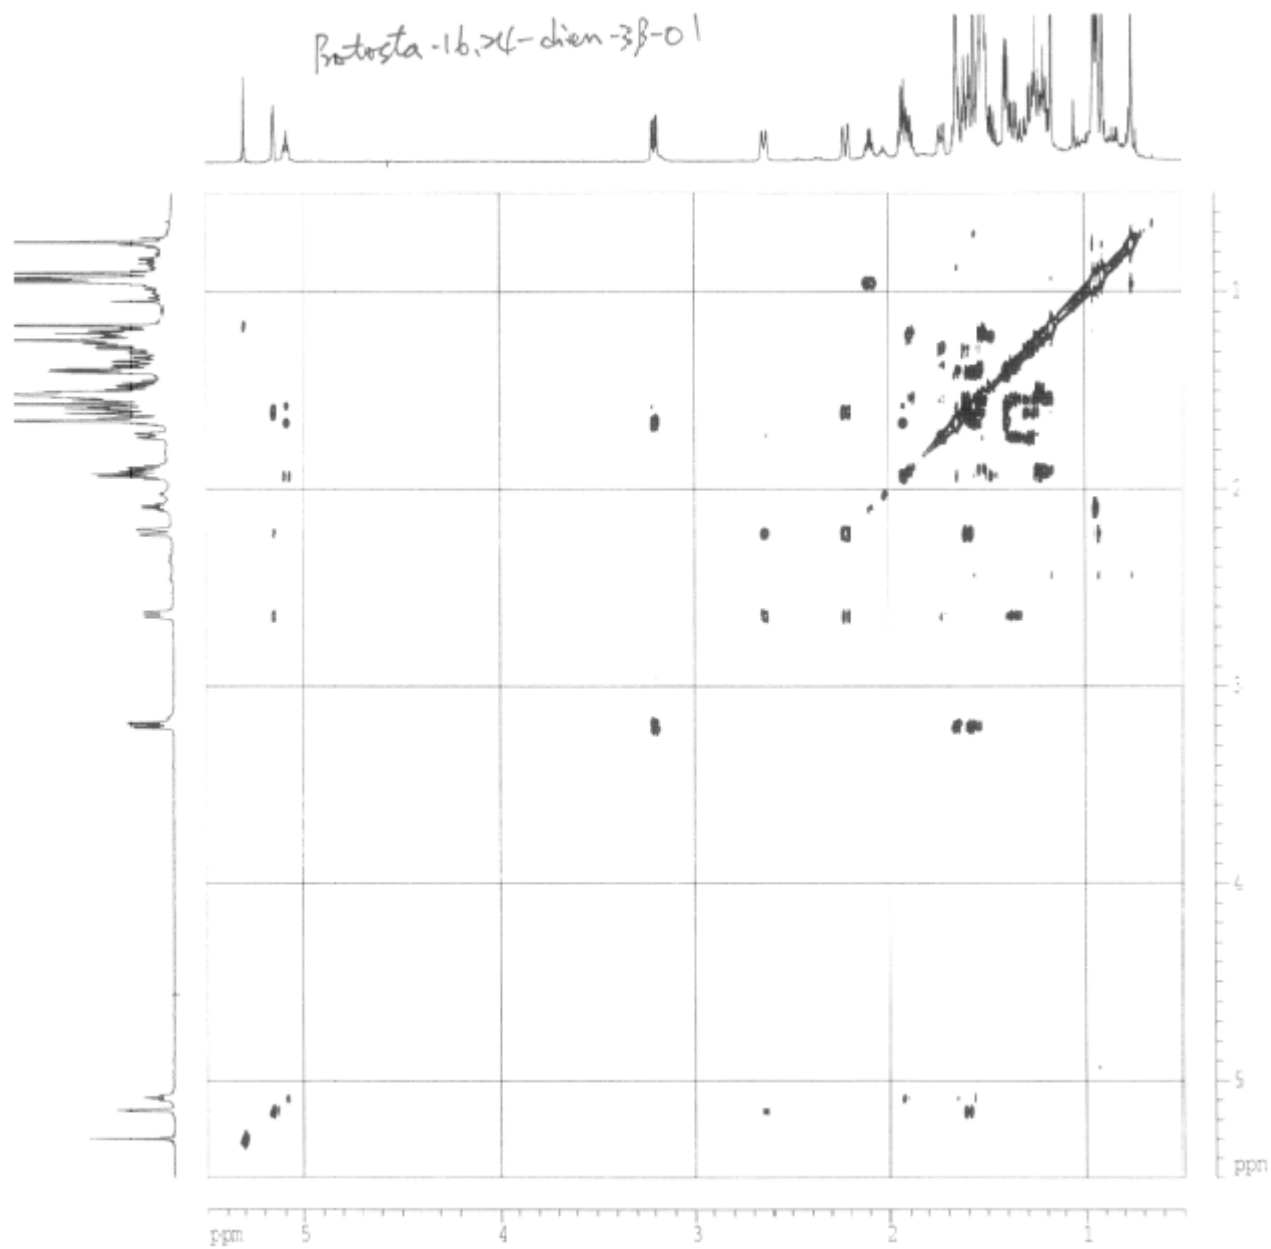

HSQC spectrum of protosta-16,24-dien-3 $\beta$ -ol, **9**

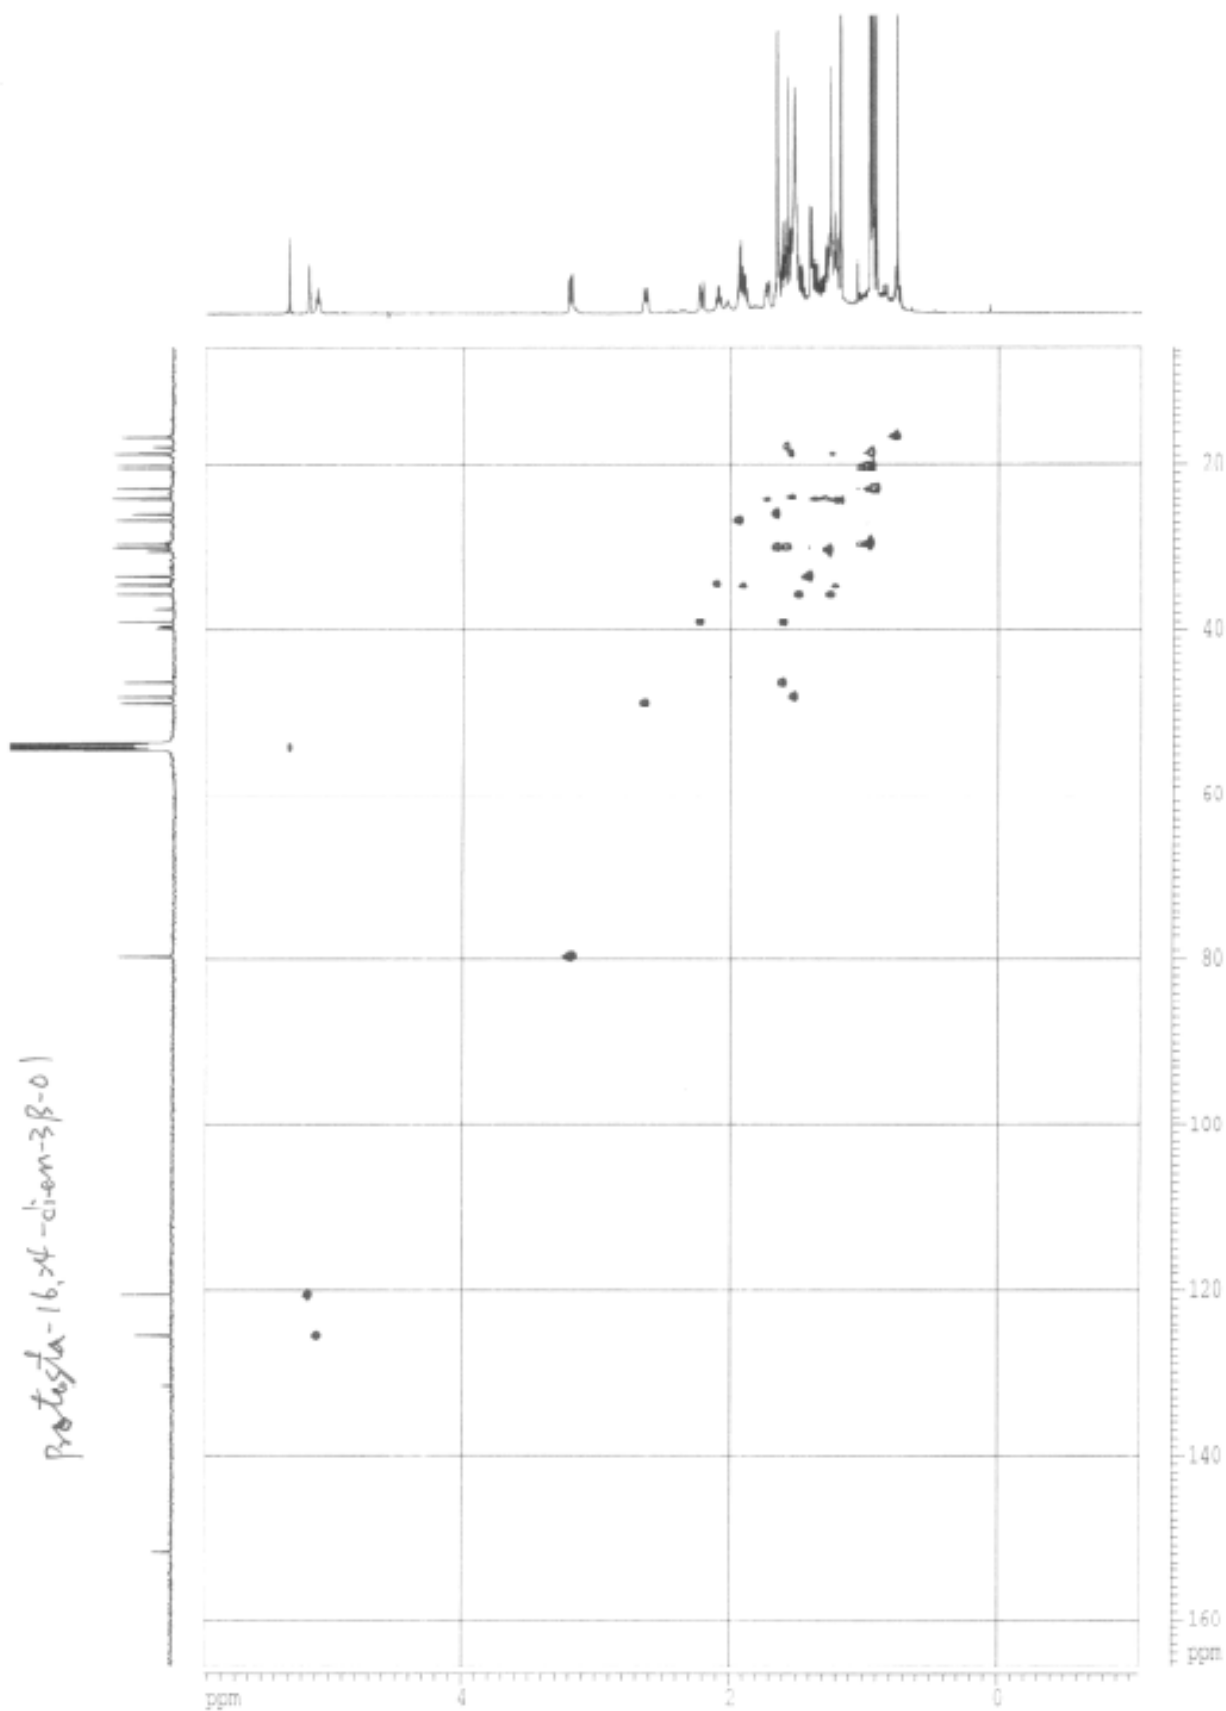



HMBC spectrum of protosta-16,24-dien-3 $\beta$ -ol, **9**

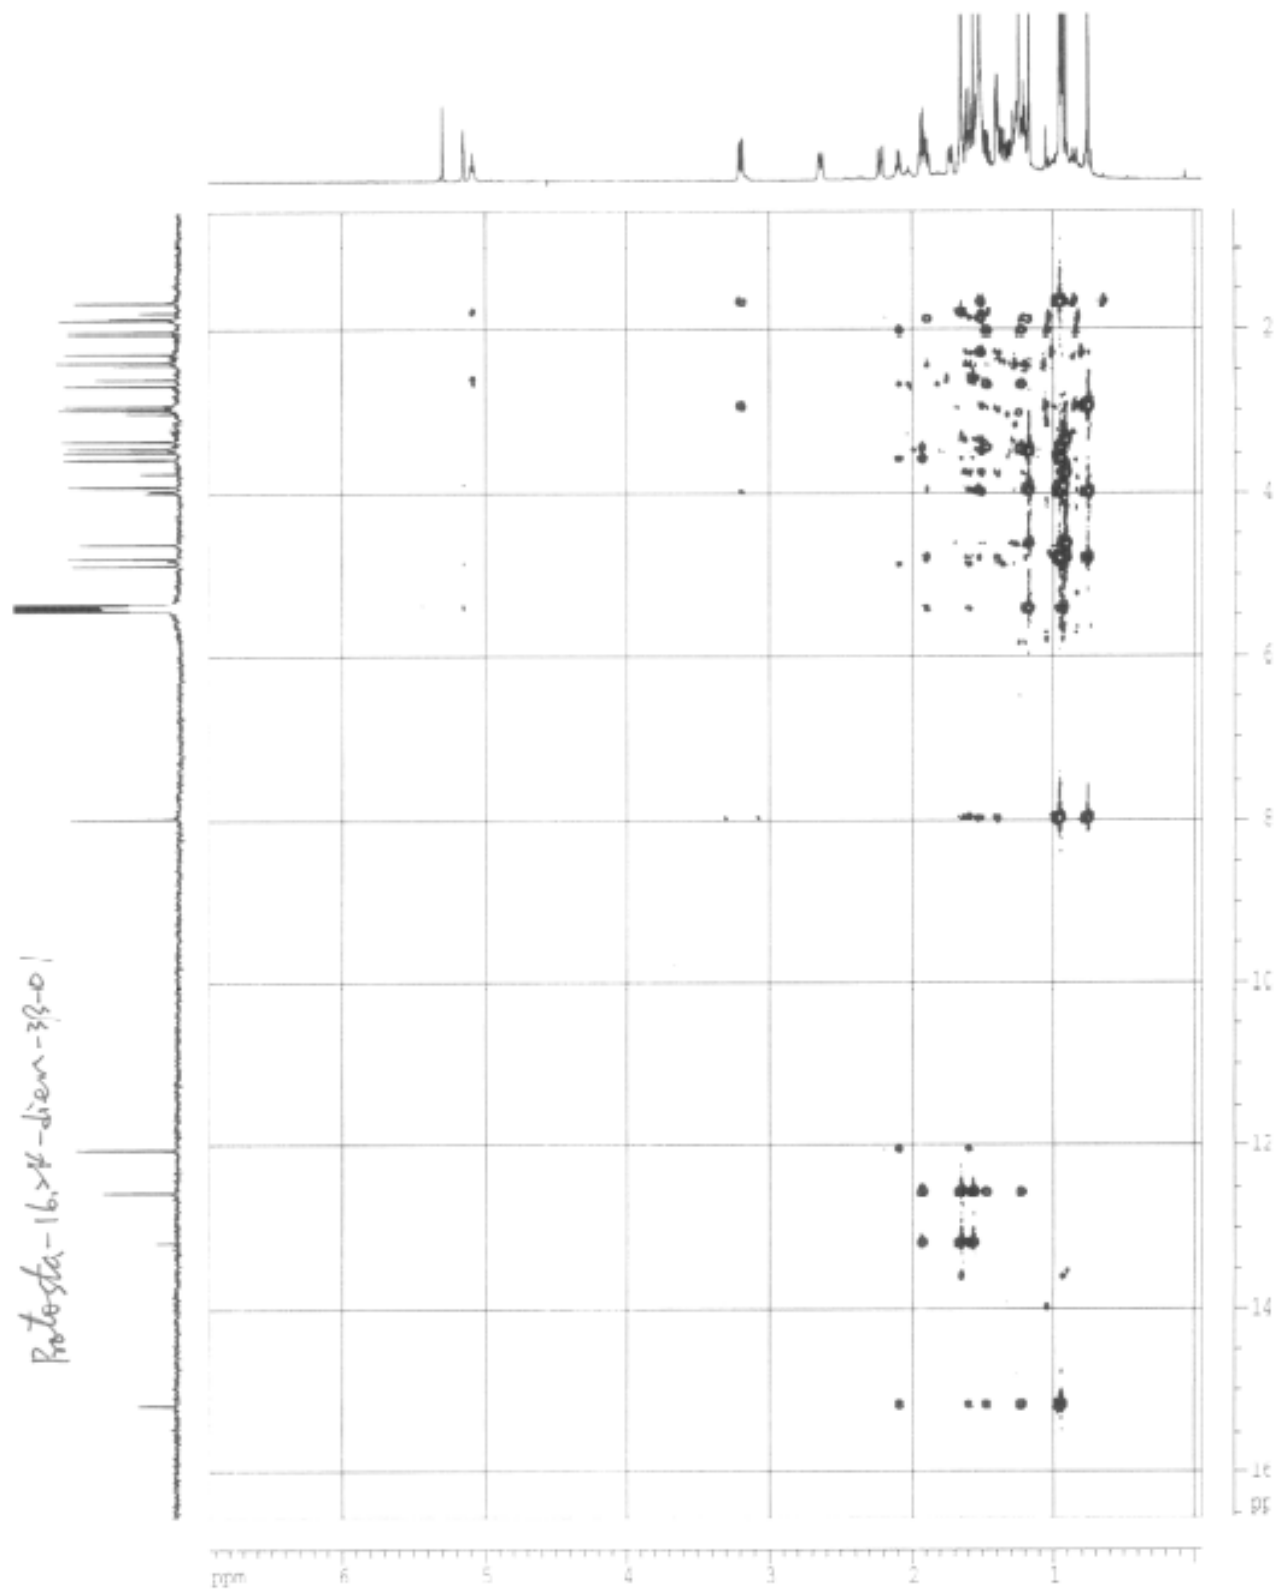

Extended Important Section of HMBC spectrum of protosta-16,24-dien-3 $\beta$ -ol, **9**

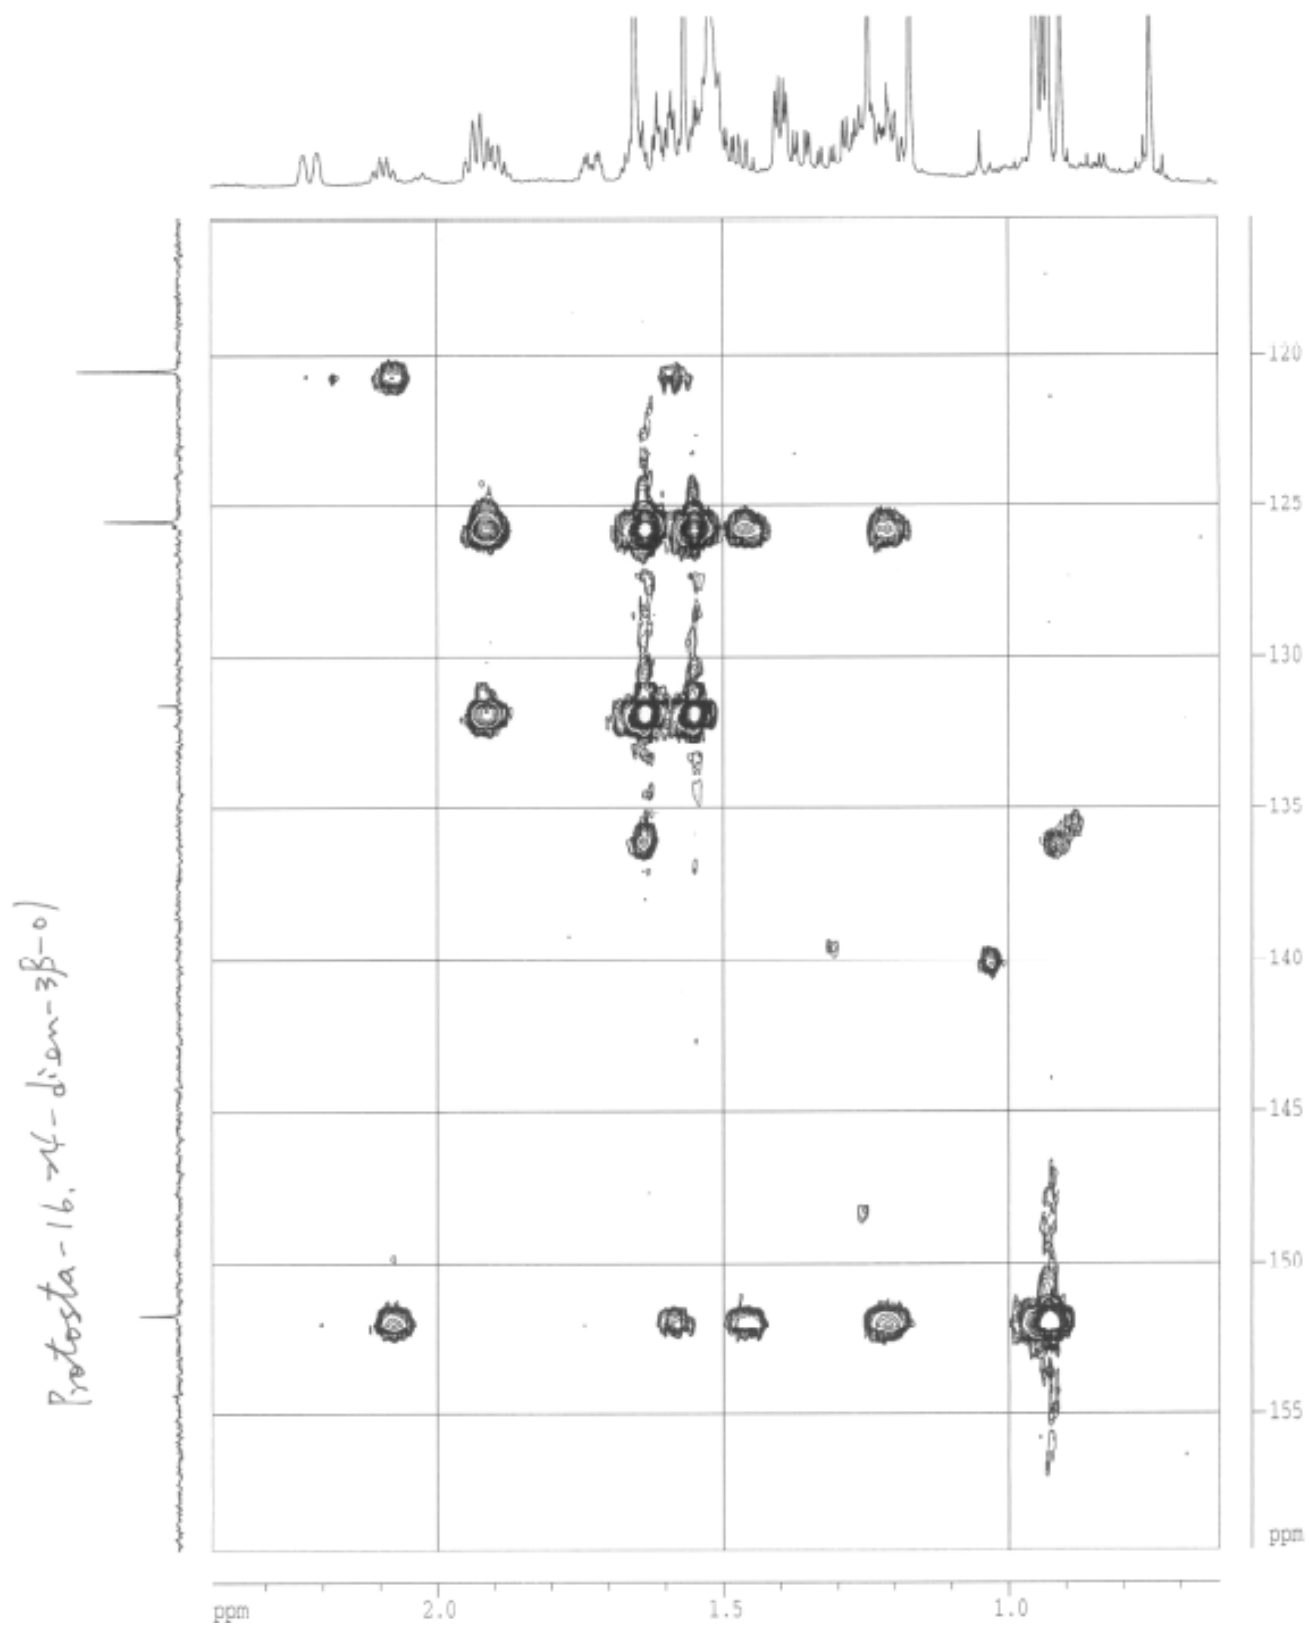

Supplement: c0ob00582g.pdf [file c0ob00582g.pdf]
